# Supplementary material
Source: PubMed Central journal article supplement (PMC7483725)
Supplement: NIHMS1604649-supplement-Supplemental.pdf [file NIHMS1604649-supplement-Supplemental.pdf]

## Supplementary Online Content

Yonek J, Lee C-M, Harrison A, Mangurian C, Tolou-Shams M. Key components of effective pediatric integrated mental health care models: a systematic review. *JAMA Pediatr*. Published March 9, 2020. doi:10.1001/jamapediatrics.2020.0023

**eTable 1.** PubMed Search Strategy

**eTable 2.** Study Quality Assessment (Jadad Score)

**eFigure 1.** Six Levels of Collaboration/Integration (Core Descriptions)

**eFigure 2.** PRISMA Flow Diagram of Study Selection

**eReferences**

This supplementary material has been provided by the authors to give readers additional information about their work.

**eTable 1.** PubMed Search Strategy

| <b>Term Categories</b>       | <b>Search Terms</b>                                                                                                                                                                                                                                                                                                                                                                                                                                                                                                                                                                                                                                                                        | <b>Results</b> |
|------------------------------|--------------------------------------------------------------------------------------------------------------------------------------------------------------------------------------------------------------------------------------------------------------------------------------------------------------------------------------------------------------------------------------------------------------------------------------------------------------------------------------------------------------------------------------------------------------------------------------------------------------------------------------------------------------------------------------------|----------------|
| Population Filter            | Search "Adolescent"[Mesh] OR "Child"[Mesh] OR adolescen*[tiab] OR child*[tiab]                                                                                                                                                                                                                                                                                                                                                                                                                                                                                                                                                                                                             | 2810447        |
| Mental Disorders in Children | Search "Mental Disorders Diagnosed in Childhood"[MeSH] OR "Mood Disorders"[MeSH] OR "Anxiety Disorders"[MeSH] OR depress*[tiab] OR anxiety*[tiab] OR "Attention Deficit Disorder with Hyperactivity" OR "attention deficit/hyperactivity"[tiab] OR "attention deficit hyperactivity" OR ADHD[tiab] OR conduct disorder*[tiab] OR "child psychiatry"[MeSH]                                                                                                                                                                                                                                                                                                                                  | 627844         |
| Primary Care Setting         | Search "Primary Health Care"[Mesh] OR "Physicians, Primary Care"[Mesh] OR "primary care"[tiab] OR "Internal Medicine"[Mesh] OR "internal medicine"[tiab] OR "General Practice"[Mesh] OR "general practice"[tiab] OR "General Practitioners"[Mesh] OR general practitioner*[tiab] OR "Family Practice"[Mesh] OR "family practice"[tiab] OR family practitioner*[tiab] OR "Pediatrics"[Mesh] OR pediatric*[tiab] OR "Pediatric Nursing"[Mesh]                                                                                                                                                                                                                                                | 512163         |
| Integrated Care              | Search "Delivery of Health Care, Integrated"[MeSH] OR integrate[tiab] OR integrated[tiab] OR integration[tiab] OR integrates[tiab] OR "Cooperative Behavior"[Mesh] OR "Combined Modality Therapy"[Mesh:NoExp] OR "Case management"[MeSH] OR case manage*[tiab] OR care manage*[tiab] OR "Disease Management"[Mesh:noexp] OR disease manage*[tiab] OR "Referral and Consultation"[Mesh] OR consult*[tiab] OR "Videoconferencing"[Mesh] OR videoconference*[tiab] OR "Telemedicine"[Mesh] OR telemedicine[tiab] OR telehealth[tiab] OR "Shared care"[tiab] OR "Collaborative care"[tiab] OR "Collaborative-care"[tiab] OR Collaborative manage*[tiab] OR Co-locat*[tiab] OR Co-manage*[tiab] | 633926         |

**eTable 2.** Study Quality Assessment (Jadad Score)

|                                                                                                          | Asarnow et al., 2009 <sup>1</sup> | Clarke et al., 2005 <sup>2</sup> | Richardson et al., 2014 <sup>3</sup> | Epstein, et al., 2007 <sup>4</sup> | Kolko et al., 2010 <sup>5</sup> | Kolko et al., 2014 <sup>6</sup> | Lavigne et al., 2008 <sup>7</sup> | Myers et al., 2015 <sup>8</sup> | Perrin et al., 2014 <sup>9</sup> | Schilling et al., 2016 <sup>10</sup> | Silverstein et al., 2015 <sup>11</sup> |
|----------------------------------------------------------------------------------------------------------|-----------------------------------|----------------------------------|--------------------------------------|------------------------------------|---------------------------------|---------------------------------|-----------------------------------|---------------------------------|----------------------------------|--------------------------------------|----------------------------------------|
| <b>Randomization</b>                                                                                     |                                   |                                  |                                      |                                    |                                 |                                 |                                   |                                 |                                  |                                      |                                        |
| Was the study described as randomized? (yes=1; no=0)                                                     | 1                                 | 1                                | 1                                    | 1                                  | 1                               | 1                               | 1                                 | 1                               | 1                                | 1                                    | 1                                      |
| Was the method to generate the sequence of randomization described and was it appropriate? (yes=1; no=0) | 1                                 | 1                                | 1                                    | 1                                  | 1                               | 1                               | 1                                 | 1                               | 1                                | 1                                    | 1                                      |
| <b>Blinding</b>                                                                                          |                                   |                                  |                                      |                                    |                                 |                                 |                                   |                                 |                                  |                                      |                                        |
| Was the study described as double-blind? (yes=1; no=0)                                                   | 0                                 | 0                                | 0                                    | 0                                  | 0                               | 0                               | 0                                 | 0                               | 0                                | 0                                    | 0                                      |
| Was the method of double-blinding described and was it appropriate? (yes=1; no=0)                        | 0                                 | 0                                | 0                                    | 0                                  | 0                               | 0                               | 0                                 | 0                               | 0                                | 0                                    | 0                                      |
| <b>Withdrawals and Dropouts</b>                                                                          |                                   |                                  |                                      |                                    |                                 |                                 |                                   |                                 |                                  |                                      |                                        |
| Were the number and reasons for withdrawal in each study condition stated? (yes=1; no=0)                 | 1                                 | 1                                | 0                                    | 0                                  | 0                               | 1                               | 0                                 | ?                               | 1                                | 1                                    | 1                                      |
| <b>Total Points (0-5)</b>                                                                                | <b>3</b>                          | <b>3</b>                         | <b>2</b>                             | <b>2</b>                           | <b>2</b>                        | <b>3</b>                        | <b>2</b>                          | <b>2</b>                        | <b>3</b>                         | <b>3</b>                             | <b>3</b>                               |

The Jadad score ranges from 0 to 5 points. Higher scores indicate higher quality.<sup>12,13</sup>

**eFigure 1. Six Levels of Collaboration/Integration (Core Descriptions)**

| COORDINATED<br>KEY ELEMENT: COMMUNICATION                                                                                                                                                                                                                                                                   |                                                                                                                                                                                                                                                                                                     | CO-LOCATED<br>KEY ELEMENT: PHYSICAL PROXIMITY                                                                                                                                                                                                                                                                                                                               |                                                                                                                                                                                                                                                                                                                                                                                             | INTEGRATED<br>KEY ELEMENT: PRACTICE CHANGE                                                                                                                                                                                                                                                                                                                                                                 |                                                                                                                                                                                                                                                                                                                                                                                                                      |
|-------------------------------------------------------------------------------------------------------------------------------------------------------------------------------------------------------------------------------------------------------------------------------------------------------------|-----------------------------------------------------------------------------------------------------------------------------------------------------------------------------------------------------------------------------------------------------------------------------------------------------|-----------------------------------------------------------------------------------------------------------------------------------------------------------------------------------------------------------------------------------------------------------------------------------------------------------------------------------------------------------------------------|---------------------------------------------------------------------------------------------------------------------------------------------------------------------------------------------------------------------------------------------------------------------------------------------------------------------------------------------------------------------------------------------|------------------------------------------------------------------------------------------------------------------------------------------------------------------------------------------------------------------------------------------------------------------------------------------------------------------------------------------------------------------------------------------------------------|----------------------------------------------------------------------------------------------------------------------------------------------------------------------------------------------------------------------------------------------------------------------------------------------------------------------------------------------------------------------------------------------------------------------|
| LEVEL 1<br>Minimal Collaboration                                                                                                                                                                                                                                                                            | LEVEL 2<br>Basic Collaboration<br>at a Distance                                                                                                                                                                                                                                                     | LEVEL 3<br>Basic Collaboration<br>Onsite                                                                                                                                                                                                                                                                                                                                    | LEVEL 4<br>Close Collaboration<br>Onsite with Some<br>System Integration                                                                                                                                                                                                                                                                                                                    | LEVEL 5<br>Close Collaboration<br>Approaching<br>an Integrated Practice                                                                                                                                                                                                                                                                                                                                    | LEVEL 6<br>Full Collaboration in<br>a Transformed/ Merged<br>Integrated Practice                                                                                                                                                                                                                                                                                                                                     |
| Behavioral health, primary care and other healthcare providers work:                                                                                                                                                                                                                                        |                                                                                                                                                                                                                                                                                                     |                                                                                                                                                                                                                                                                                                                                                                             |                                                                                                                                                                                                                                                                                                                                                                                             |                                                                                                                                                                                                                                                                                                                                                                                                            |                                                                                                                                                                                                                                                                                                                                                                                                                      |
| In separate facilities,<br>where they:                                                                                                                                                                                                                                                                      | In separate facilities,<br>where they:                                                                                                                                                                                                                                                              | In same facility not<br>necessarily same offices,<br>where they:                                                                                                                                                                                                                                                                                                            | In same space within the<br>same facility, where they:                                                                                                                                                                                                                                                                                                                                      | In same space within<br>the same facility (some<br>shared space), where<br>they:                                                                                                                                                                                                                                                                                                                           | In same space within the<br>same facility, sharing all<br>practice space, where<br>they:                                                                                                                                                                                                                                                                                                                             |
| <ul style="list-style-type: none"> <li>» Have separate systems</li> <li>» Communicate about cases only rarely and under compelling circumstances</li> <li>» Communicate, driven by provider need</li> <li>» May never meet in person</li> <li>» Have limited understanding of each other's roles</li> </ul> | <ul style="list-style-type: none"> <li>» Have separate systems</li> <li>» Communicate periodically about shared patients</li> <li>» Communicate, driven by specific patient issues</li> <li>» May meet as part of larger community</li> <li>» Appreciate each other's roles as resources</li> </ul> | <ul style="list-style-type: none"> <li>» Have separate systems</li> <li>» Communicate regularly about shared patients, by phone or e-mail</li> <li>» Collaborate, driven by need for each other's services and more reliable referral</li> <li>» Meet occasionally to discuss cases due to close proximity</li> <li>» Feel part of a larger yet ill-defined team</li> </ul> | <ul style="list-style-type: none"> <li>» Share some systems, like scheduling or medical records</li> <li>» Communicate in person as needed</li> <li>» Collaborate, driven by need for consultation and coordinated plans for difficult patients</li> <li>» Have regular face-to-face interactions about some patients</li> <li>» Have a basic understanding of roles and culture</li> </ul> | <ul style="list-style-type: none"> <li>» Actively seek system solutions together or develop work-a-rounds</li> <li>» Communicate frequently in person</li> <li>» Collaborate, driven by desire to be a member of the care team</li> <li>» Have regular team meetings to discuss overall patient care and specific patient issues</li> <li>» Have an in-depth understanding of roles and culture</li> </ul> | <ul style="list-style-type: none"> <li>» Have resolved most or all system issues, functioning as one integrated system</li> <li>» Communicate consistently at the system, team and individual levels</li> <li>» Collaborate, driven by shared concept of team care</li> <li>» Have formal and informal meetings to support integrated model of care</li> <li>» Have roles and cultures that blur or blend</li> </ul> |

Source: Heath B, Wise Romero P, and Reynolds K. *A Review and Proposed Standard Framework for Levels of Integrated Healthcare*. Washington, DC: SAMHSA-HRSA Center for Integrated Health Solutions; March 2013. Accessed from: [www.integration.samhsa.gov/resource/standard-framework-for-levels-of-integrated-healthcare](http://www.integration.samhsa.gov/resource/standard-framework-for-levels-of-integrated-healthcare)

**eFigure 2.** PRISMA Flow Diagram of Study Selection

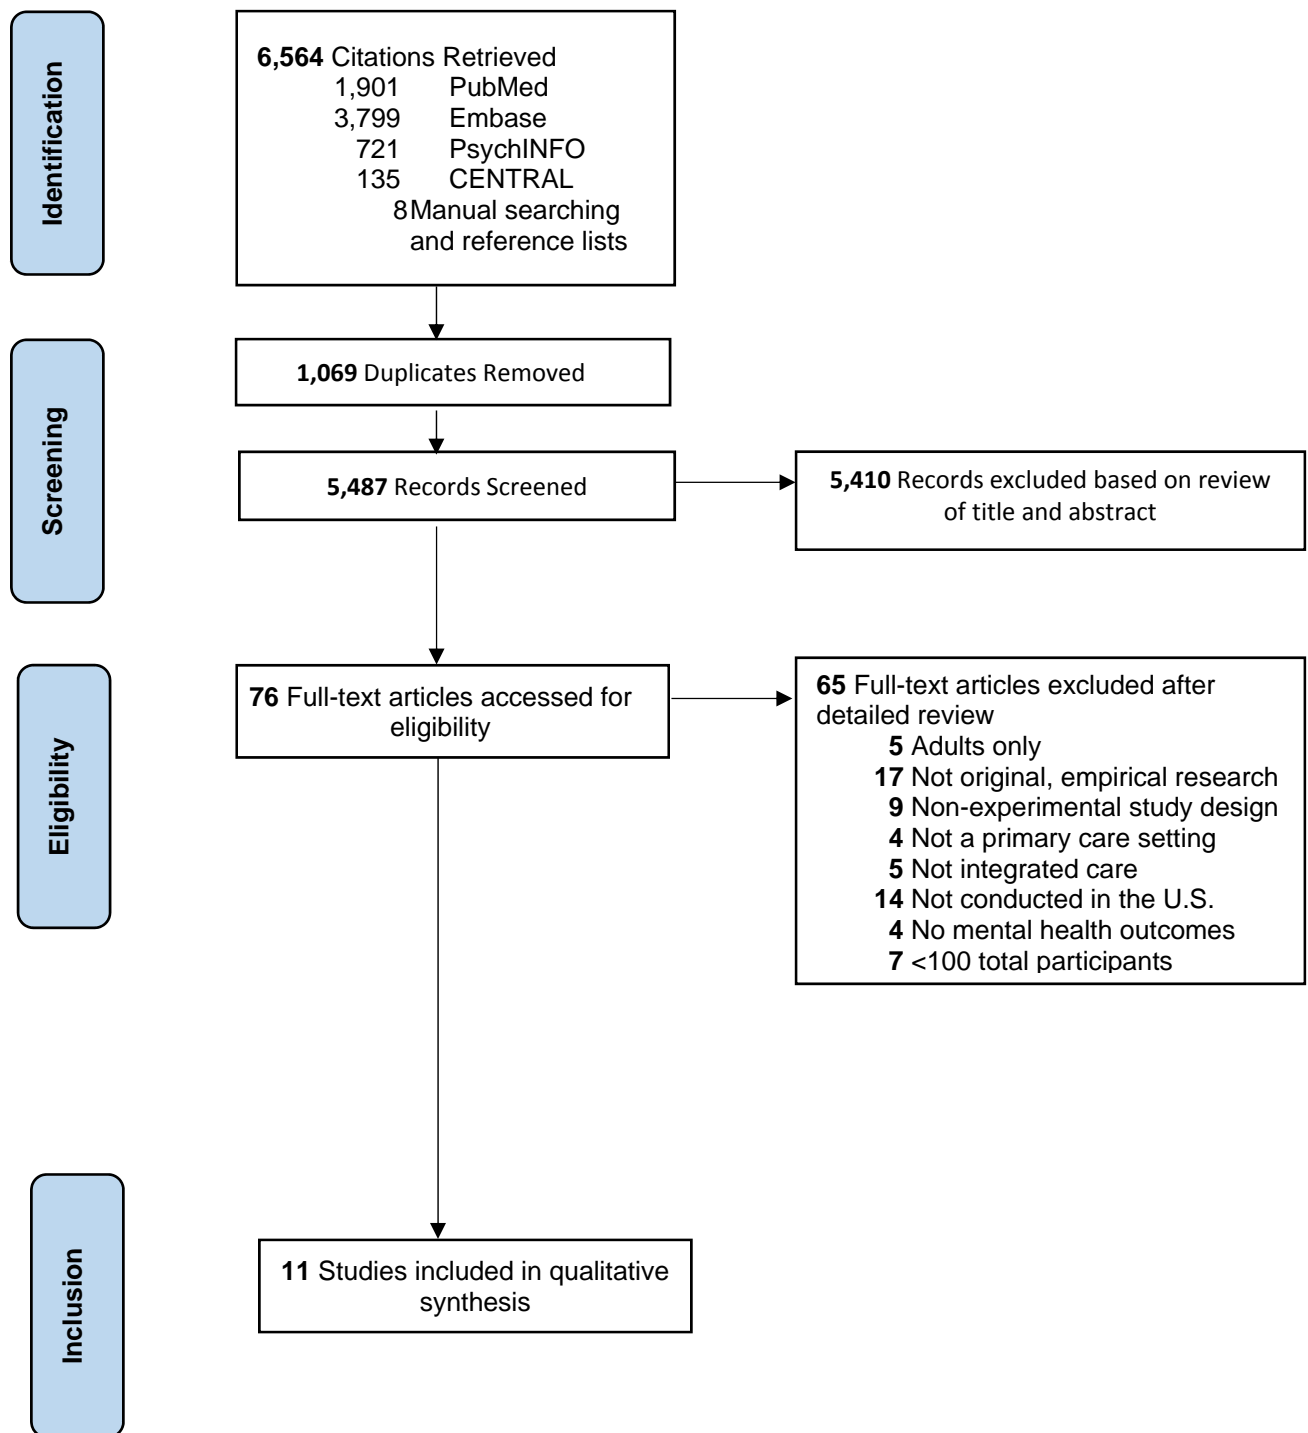

## eReferences

1. Asarnow, J. R., Jaycox, L. H., Tang, L., Duan, N., LaBorde, A. P., Zeledon, L. R., ... Wells, K. B. (2009). Long-term benefits of short-term quality improvement interventions for depressed youths in primary care. *Am J Psychiatry*, *166*(9), 1002–1010. doi:10.1176/appi.ajp.2009.08121909
2. Clarke, G., Debar, L., Lynch, F., Powell, J., Gale, J., O'Connor, E., ... Hertert, S. (2005). A randomized effectiveness trial of brief cognitive-behavioral therapy for depressed adolescents receiving antidepressant medication. *J Am Acad Child Adolesc Psychiatry*, *44*(9), 888–898. doi:10.1016/S08980-8567(09)62194-8
3. Richardson, L. P., Ludman, E., McCauley, E., Lindenbaum, J., Larison, C., Zhou, C., ... Katon, W. (2014). Collaborative care for adolescents with depression in primary care: a randomized clinical trial. *Jama*, *312*(8), 809–816. doi:10.1001/jama.2014.9259
4. Epstein, J. N., Rabiner, D., Johnson, D. E., Fitzgerald, D. P., Chrisman, A., Erkanli, A., ... Conners, C. K. (2007). Improving attention-deficit/hyperactivity disorder treatment outcomes through use of a collaborative consultation treatment service by community-based pediatricians: a cluster randomized trial. *Arch Pediatr Adolesc Med*, *161*(9), 835–840. doi:10.1001/archpedi.161.9.835
5. Kolko, D. J., Campo, J., Kilbourne, A. M., Hart, J., Sakolsky, D., & Wisniewski, S. (2014). Collaborative care outcomes for pediatric behavioral health problems: a cluster randomized trial. *Pediatrics*, *133*(4), e981-92. doi:10.1542/peds.2013-2516
6. Kolko, D. J., Campo, J. V., Kelleher, K., & Cheng, Y. (2010). Improving access to care and clinical outcome for pediatric behavioral problems: a randomized trial of a nurse-administered intervention in primary care. *J Dev Behav Pediatr*, *31*(5), 393–404. doi:10.1097/DBP.0b013e3181dff307
7. Lavigne, J. V., Lebaillly, S. A., Gouze, K. R., Cicchetti, C., Pochyly, J., Arend, R., ... Binns, H. J. (2008). Treating oppositional defiant disorder in primary care: a comparison of three models. *J Pediatr Psychol*, *33*(5), 449–461. doi:10.1093/jpepsy/jsm074
8. Myers, K., Vander Stoep, A., Zhou, C., McCarty, C. A., & Katon, W. (2015). Effectiveness of a telehealth service delivery model for treating attention-deficit/hyperactivity disorder: a community-based randomized controlled trial. *J Am Acad Child Adolesc Psychiatry*, *54*(4), 263–274. doi:10.1016/j.jaac.2015.01.009
9. Perrin, E. C., Sheldrick, R. C., McMenemy, J. M., Henson, B. S., & Carter, A. S. (2014). Improving parenting skills for families of young children in pediatric settings: a randomized clinical trial. *JAMA Pediatr*, *168*(1), 16–24. doi:10.1001/jamapediatrics.2013.2919
10. Schilling, S., French, B., Berkowitz, S. J., Dougherty, S. L., Scribano, P. V., & Wood, J. N. (2017). Child-Adult Relationship Enhancement in Primary Care (PriCARE): A Randomized Trial of a Parent Training for Child Behavior Problems. *Acad Pediatr*, *17*(1), 53–60. doi:10.1016/j.acap.2016.06.009
11. Silverstein, M., Hironaka, L. K., Walter, H. J., Feinberg, E., Sandler, J., Pellicer, M., ... Cabral, H. (2015). Collaborative care for children with ADHD symptoms: a randomized

comparative effectiveness trial. *Pediatrics*, 135(4), e858-67. doi:10.1542/peds.2014-3221

12. Halpern SH, Douglas MJ, eds. Appendix: Jadad scale for reporting randomized controlled trials. In: *Evidence-Based Obstetric Anesthesia*. Hoboken, NJ: Blackwell Publishing Ltd; 2007:237-238. doi:10.1002/9780470988343.app1
13. Jadad AR, Moore RA, Carroll D, et al. Assessing the quality of reports of randomized clinical trials: is blinding necessary? *Control Clin Trials*. 1996;17(1):1-12. <http://www.ncbi.nlm.nih.gov/pubmed/8721797>.
14. Heath B, Wise Romero P, Reynolds KA. *A Review and Proposed Standard Framework for Levels of Integrated Healthcare*. Washington, DC: SAMHSA-HRSA Center for Integrated Health Solutions; March 2013. <https://www.integration.samhsa.gov/resource/standard-framework-for-levels-of-integrated-healthcare>
